# Supplementary material for: Endothelial cells are progenitors of cardiac pericytes and vascular smooth muscle cells
Source: PubMed Central journal article supplement (PMC4990645; doi:10.1038/ncomms12422), 2016-08-12
Supplement: ncomms12422-s1.pdf [file ncomms12422-s1.pdf]

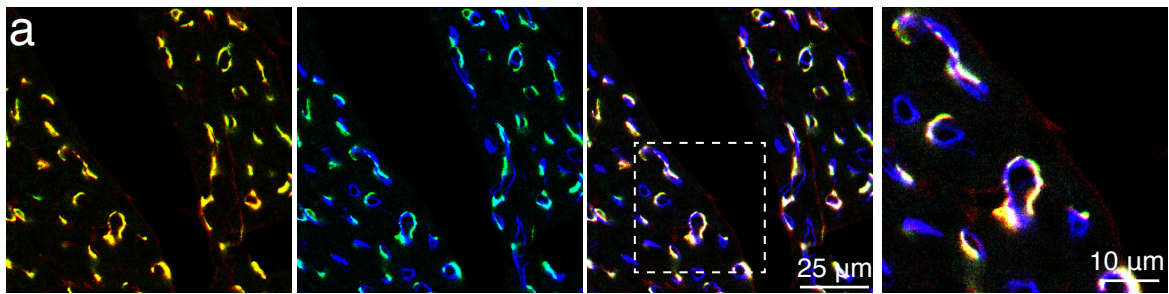

*Pdgfrb-CreERT2;R26-mTmG*

GFP(*Pdgfrb-CreERT2*) PDGFR $\beta$  isolectin B4

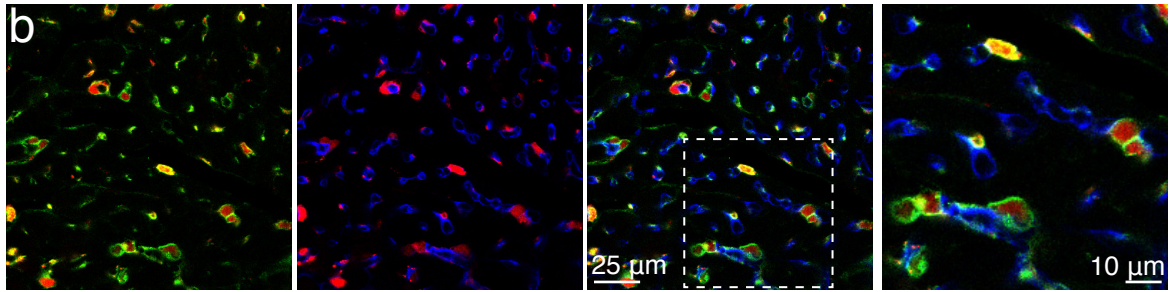

*Tg(Cspg4-DsRed.T1)<sup>1Akik</sup>*

PDGFR $\beta$  dsRed isolectin B4

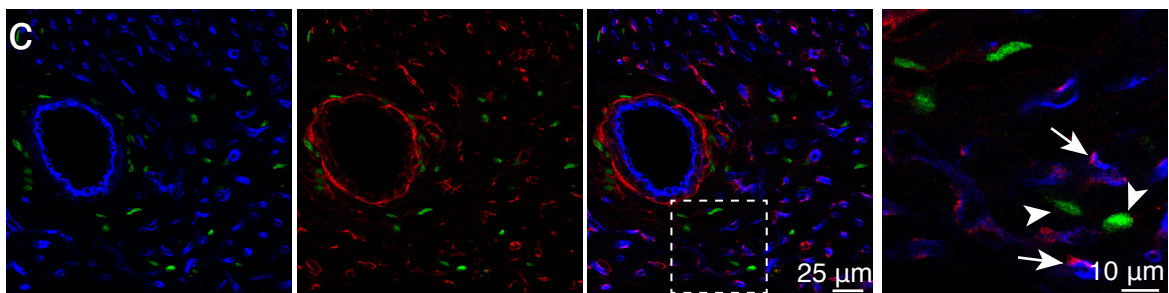

*Pdgfra<sup>tm11(EGFP)Sor</sup>*

GFP(H2B-GFP) PDGFR $\beta$  isolectin B4

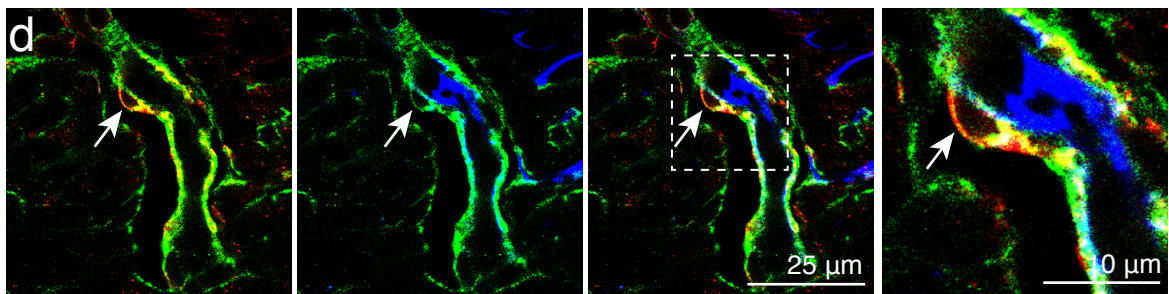

Wild-type

CD13 NG2 isolectin B4

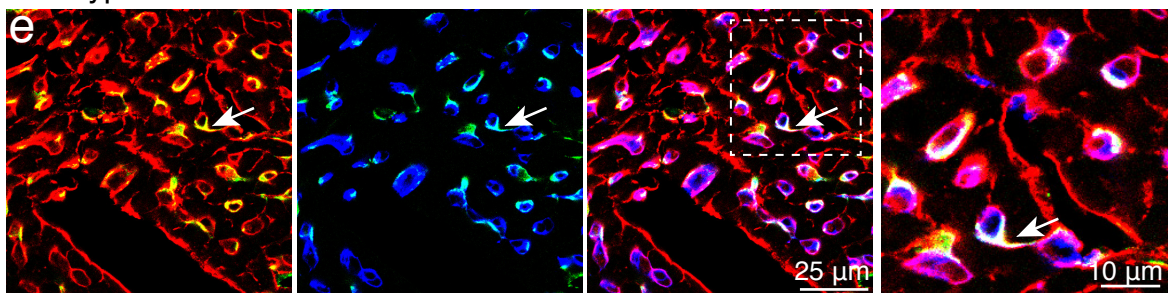

Wild-type

PDGFR $\beta$  collagen4 isolectin B4

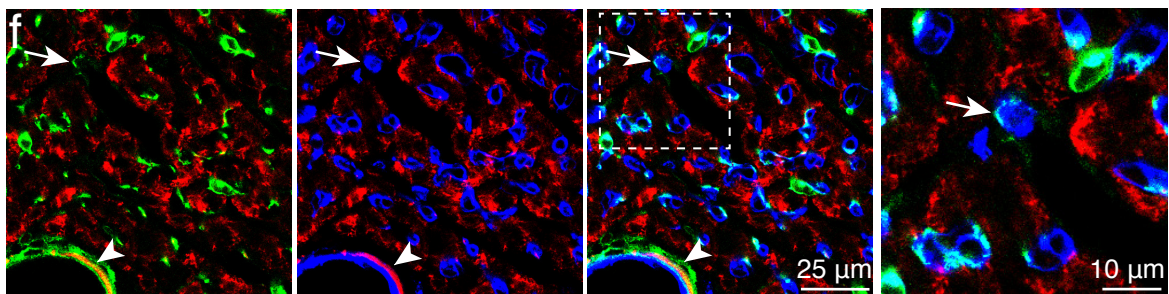

Wild-type

PDGFR $\beta$  desmin isolectin B4

**Supplementary Figure 1 | Molecular markers for capillary-associated cardiac mural cells at postnatal heart.**

(a) Genetic labeling of mural cells in the P6 heart. Following *Pdgfrb(BAC)-CreERT2*-mediated recombination of the *Rosa26-mTmG* Cre reporter, GFP expression (green) overlapped with PDGFR $\beta$  immunostaining (red) around myocardial capillary ECs (isolectin B4, blue).

(b) *Tg(Cspg4-dsRed.T1)<sup>1A<sub>kik</sub></sup>* reporter expression (dsRed, red) indicates overlapping expression of NG2/Cspg4 and PDGFR $\beta$  (green) in vessel-associated (isolectin B4, blue) cells.

(c) *Pdgfra<sup>tm11(EGFP)Sor</sup>* (nuclear H2B-GFP, green) labeling of PDGFR $\alpha$ + interstitial cells (arrowheads) but not of PDGFR $\beta$ + (red) vessel-associated (isolectin B4, blue) mural cells (arrows) at P6.

(d-f), Confocal images of P6 wild-type myocardium after staining for the indicated markers. Arrows mark cardiac mural cells associated with capillaries (isolectin B4, blue). Desmin (red, f) staining is abundant in cardiomyocytes.

Images on the right show higher magnifications of corresponding insets.

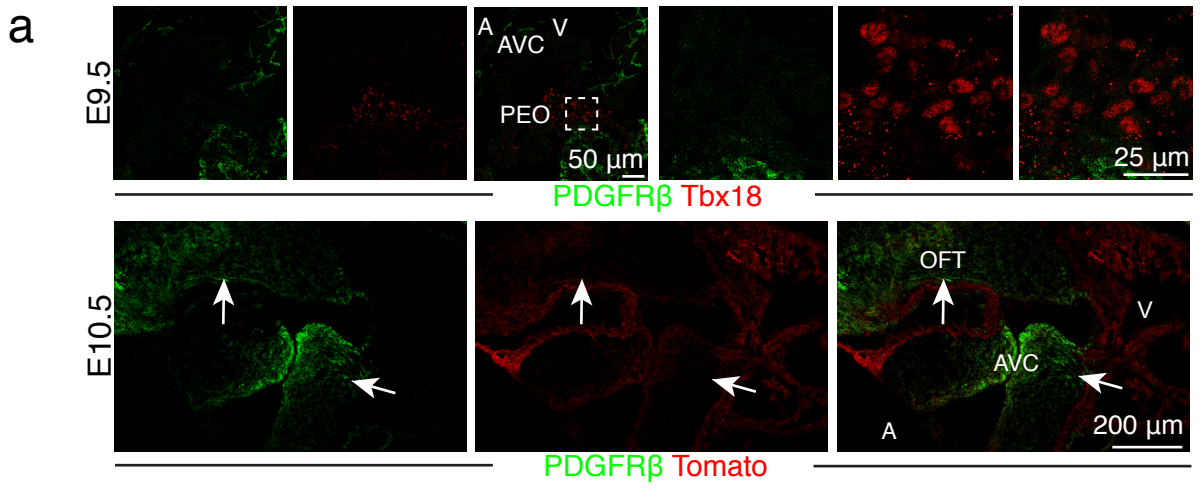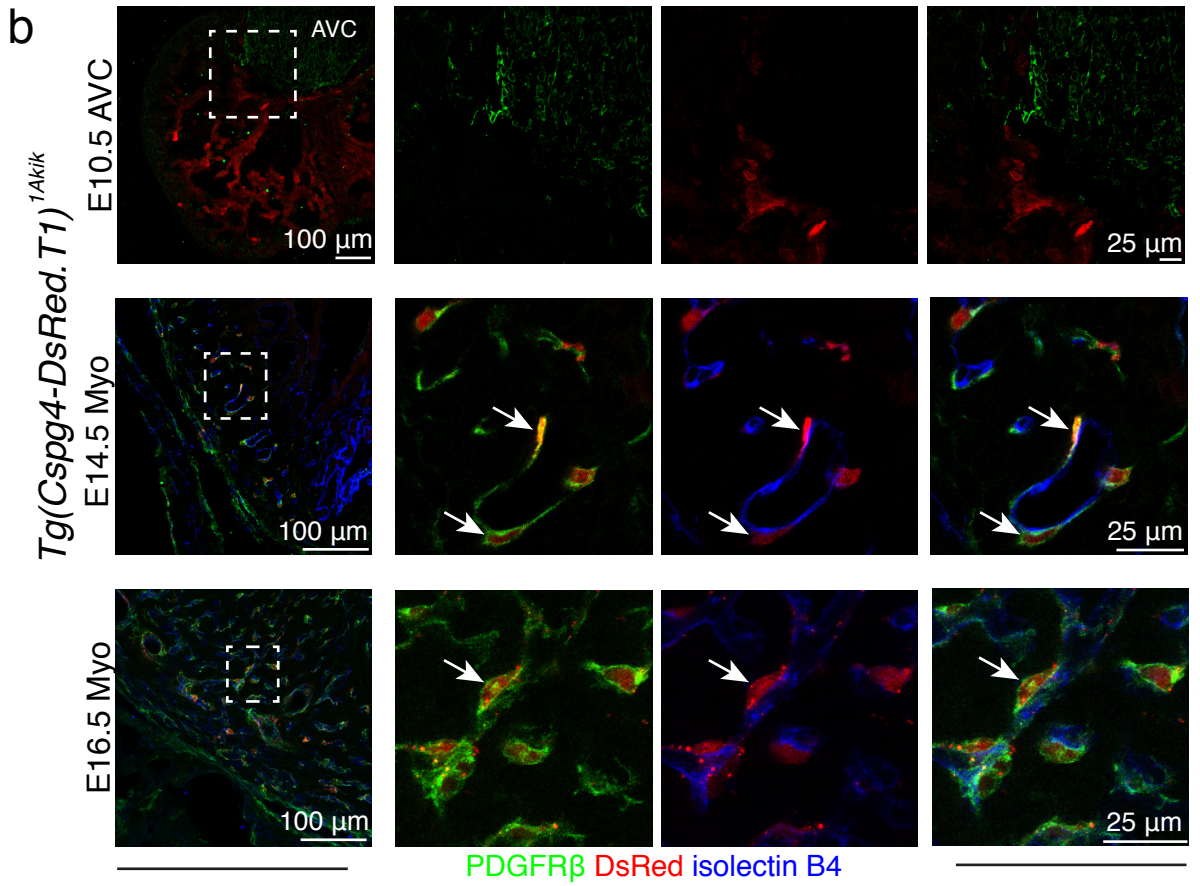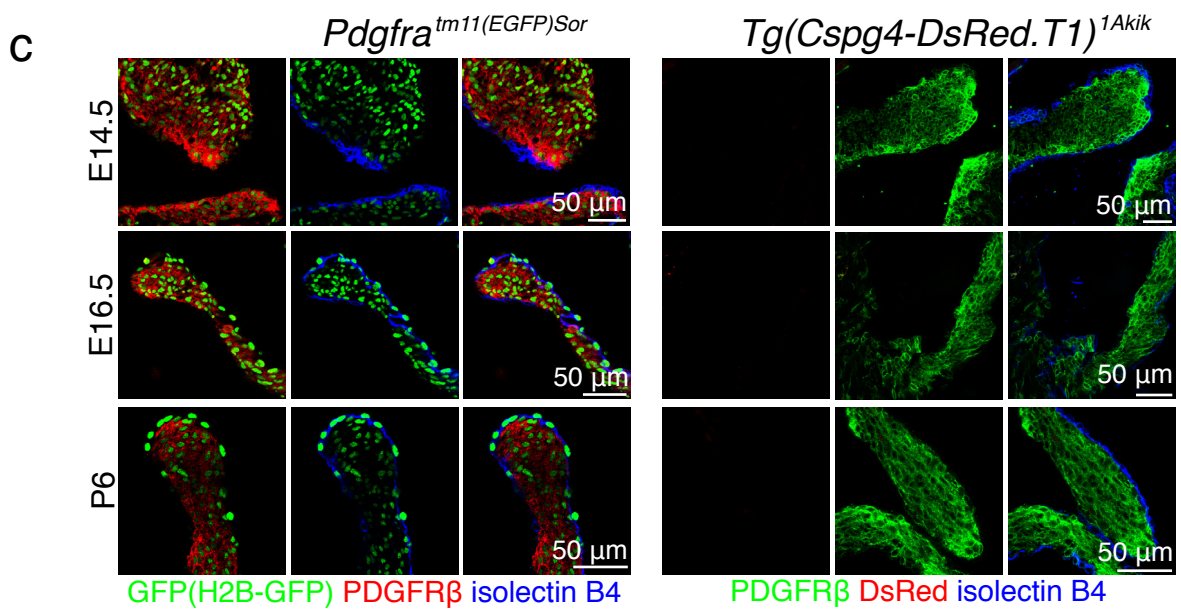

**Supplementary Figure 2 | Distribution and molecular properties of PDGFR $\beta$  cells in heart.**

(a) PDGFR $\beta$  protein (green) expression pattern in the E9.5 and E10.5 heart, as indicated. At E9.5, PDGFR $\beta$ <sup>+</sup> cells were found around the atrioventricular canal (AVC) but were absent from the Tbx18<sup>+</sup> (red) proepicardial organ (PEO). Panels on the right show higher magnification of inset. PDGFR $\beta$ -immunostained cell clusters (arrows in bottom row) were located in the outflow tract (OFT) and the endocardial cushions of the AVC. Heart morphology was visualized by tdTomato protein expression (red) of the unrecombined *Rosa26-mTmG* Cre reporter allele. A, atrium; V, ventricle.

(b) *Tg(Cspg4-dsRed.T1)<sup>1A<sub>kik</sub></sup>* expression (DsRed, red) was absent in PDGFR $\beta$  (green) immunostained cells in the E10.5 atrioventricular canal (AVC). In contrast, co-expression of both markers was seen in vessel-associated (isolectin B4, blue) cells (arrows) in the E14.5 and E16.5 compact myocardium (Myo).

(c) Overlapping PDGFR $\beta$  immunostaining (red) and *Pdgfra<sup>tm11(EGFP)<sup>Sor</sup></sup>* reporter expression (nuclear H2B-GFP, green) in heart valves at E14.5, E16.5 and P6 (left). In contrast to PDGFR $\beta$  (green), *Tg(Cspg4-dsRed.T1)<sup>1A<sub>kik</sub></sup>* expression (DsRed, red) was absent from heart valves at the indicated stages. Endocardial ECs, isolectin B4 (blue).

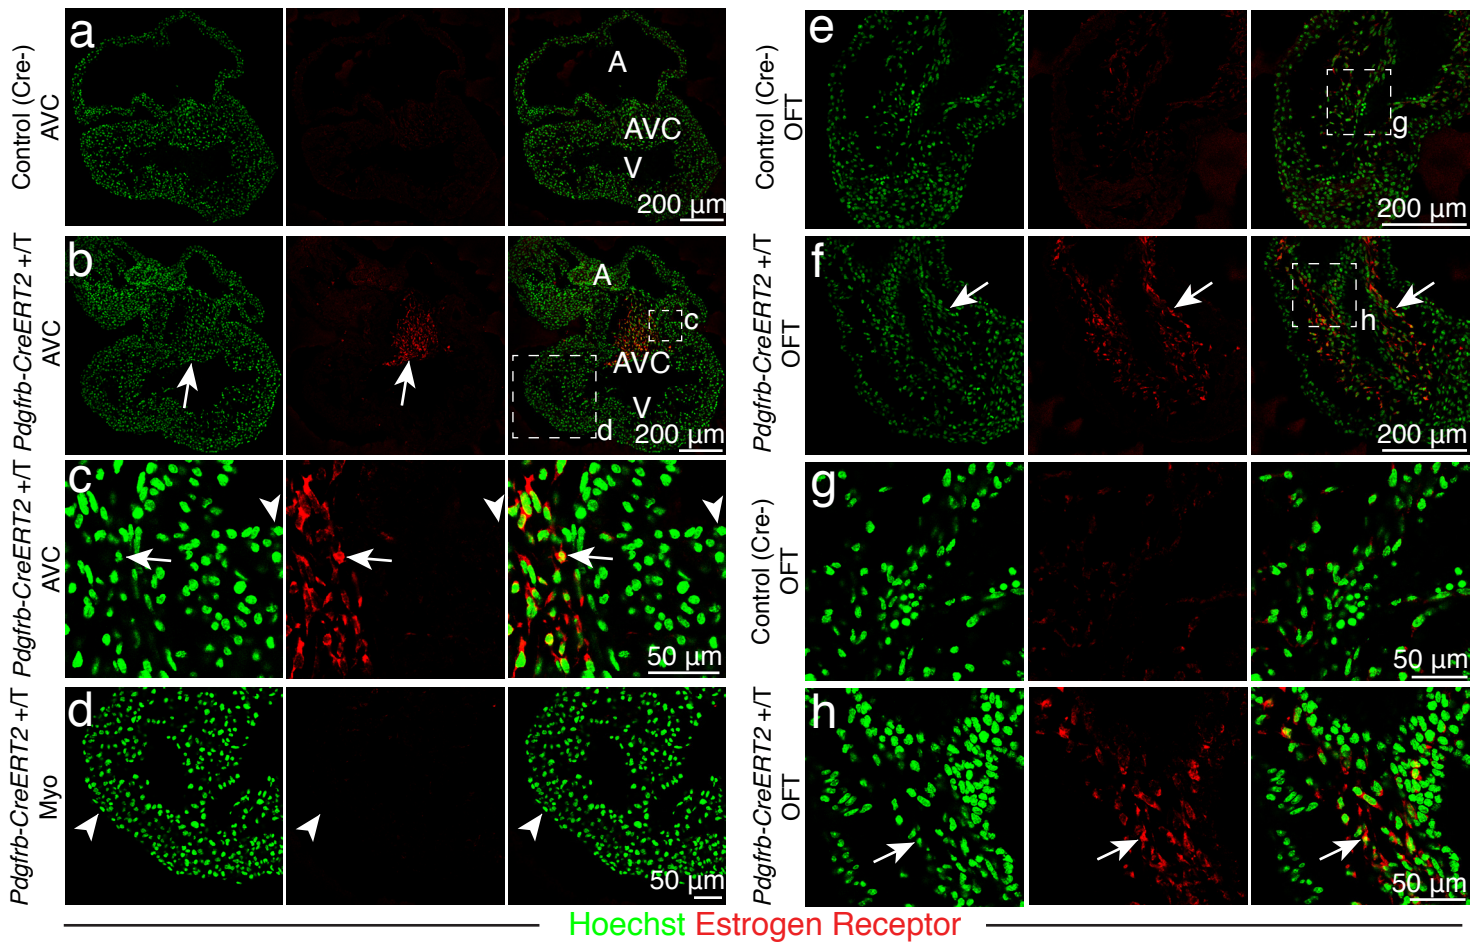

### Supplementary Figure 3 | Verification of *Pdgfrb(BAC)-CreERT2* activity in heart.

(a-h) Immunostaining of CreERT2 (estrogen receptor, red) in E10.5 *Pdgfrb(BAC)-CreERT2* transgenic and Cre-negative littermate control hearts, as indicated. Overview pictures show specific labeling of CreERT2+ cells (arrows) in the E10.5 atrioventricular canal (AVC) (b). High magnification of insets in (b) shows CreERT2 expression in cells of the AVC (c) but not in the E10.5 epicardium (arrowheads) or myocardium (Myo) (d). CreERT2+ staining (arrows) was also seen in cells of the E10.5 outflow tract (OFT) (f and h) but was absent in Cre-negative control sections (e and g).

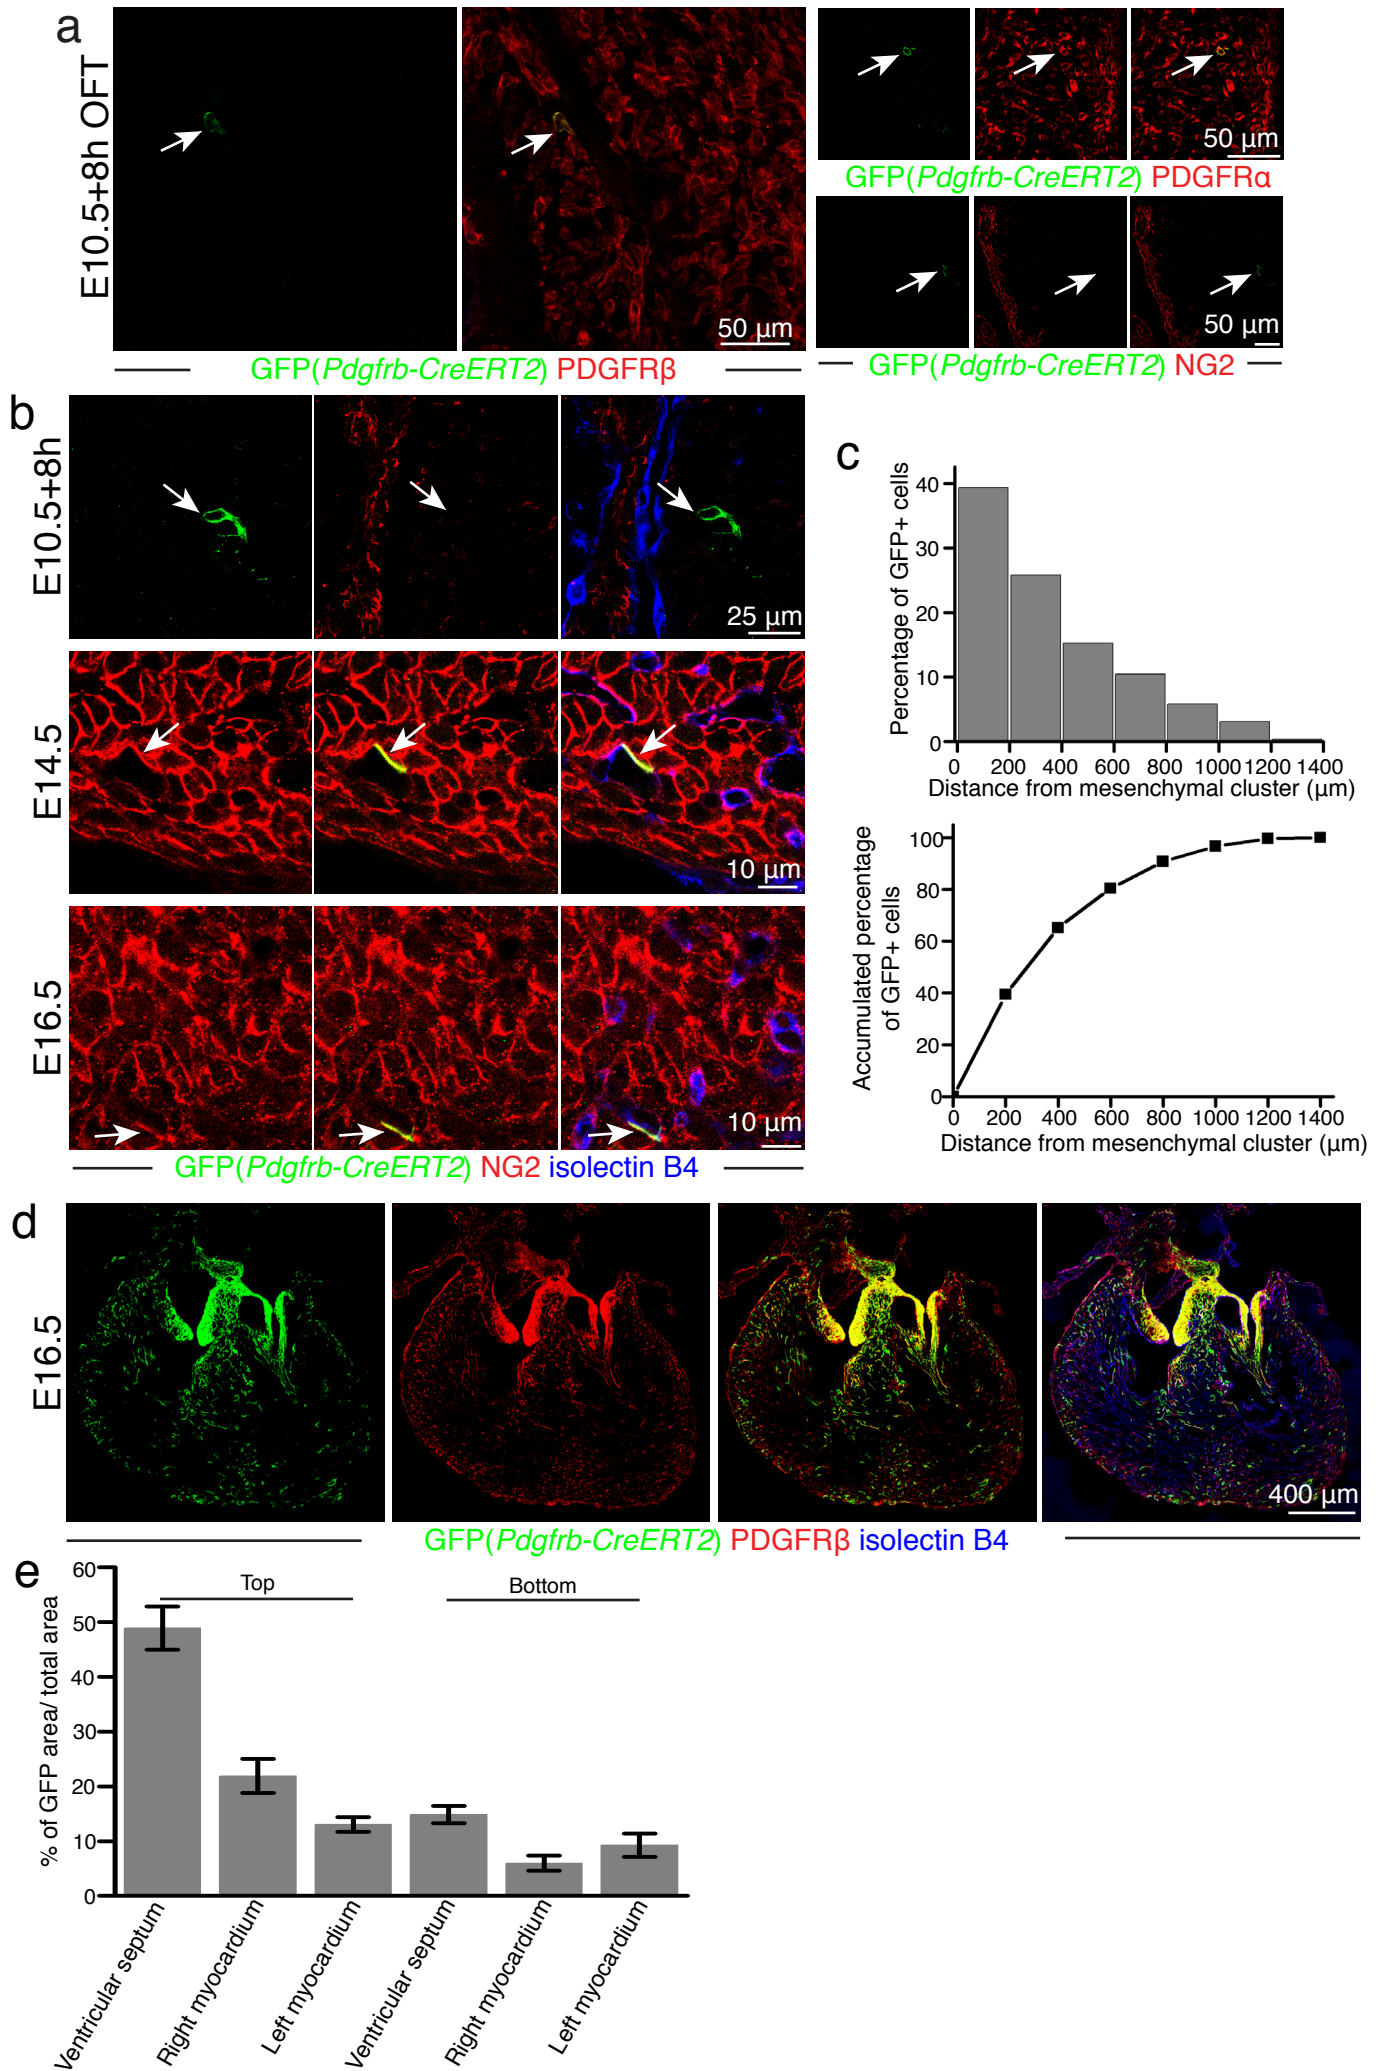

**Supplementary Figure 4 | Clonal analysis using *Pdgfrb-CreERT2 Rosa26-mTmG* mice in heart.**

(a) Genetic labeling of cell clones in *Pdgfrb(BAC)-CreERT2 Rosa26-mTmG* double transgenic embryos. 8 hours after 4-hydroxytamoxifen (4-OHT) administration, GFP+ cells (arrows) in the OFT were PDGFR $\beta$ +, PDGFR $\alpha$ + and NG2-.

(b) Sections from *Pdgfrb(BAC)-CreERT2 Rosa26-mTmG* double transgenic hearts at the indicated stages after 4-OHT administration at E10.5. Recombined, GFP+ (green, arrows) cell clones were negative for NG2 (red), located in the AVC and not associated with isolectin B4+ (blue) vessels at E10.5+8h. GFP+ NG2+ cells were associated with vessels in the compact myocardium at E14.5 and E16.5.

(c) Statistical analysis of the distance of GFP+ cells from the mesenchymal clusters at E14.5 (top) and accumulated distribution of GFP+ cells within the indicated distance range (bottom). Analysis was based on 624 GFP+ cells from 6 E14.5 hearts.

(d) Representative distribution of mesenchymal progenitor descendant cells in *Pdgfrb(BAC)-CreERT2 Rosa26-mTmG* double transgenic hearts at E16.5 after consecutive administration of 3mg tamoxifen from E9.5 to E12.5.

(e) Analysis of mesenchymal progenitor-derived cell distribution in E16.5 heart based on images as shown in (d). The coverage of the indicated regions by GFP+ cells in the top or bottom part of *Pdgfrb(BAC)-CreERT2 Rosa26-mTmG* double transgenic hearts were divided by the total tissue area (excluding lumens). Quantitation was based on 12 sections from 3 E16.5 hearts.

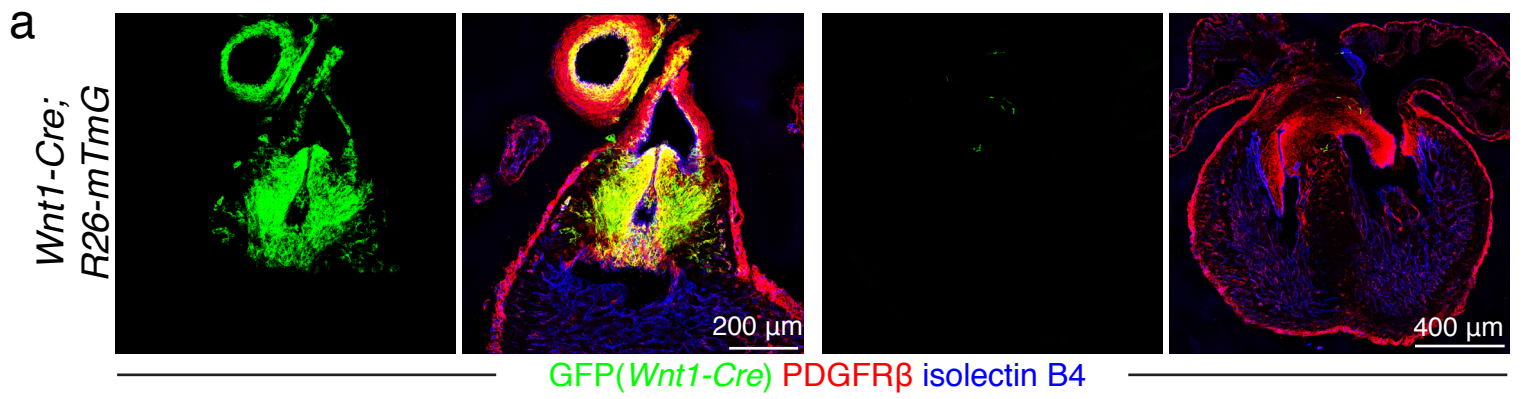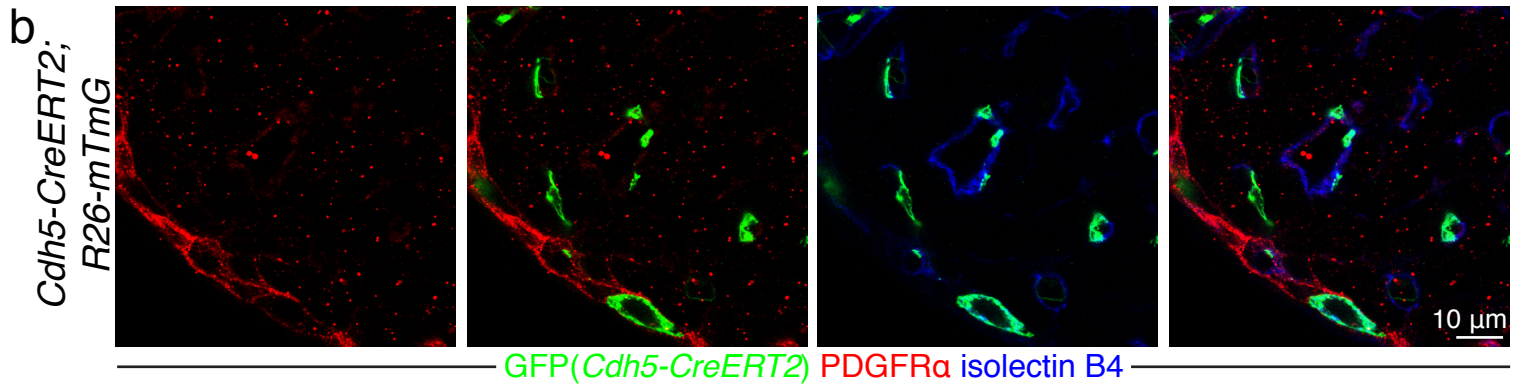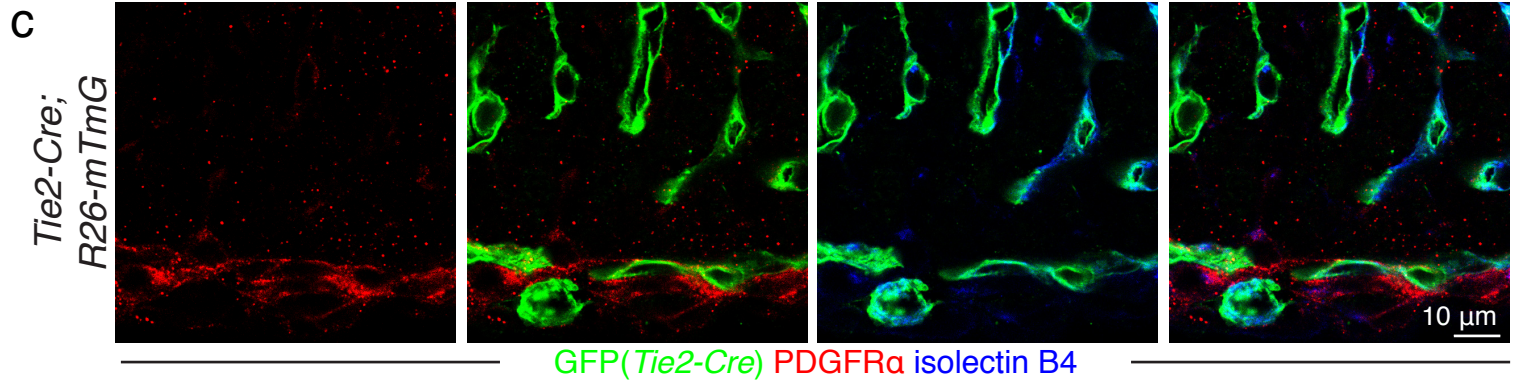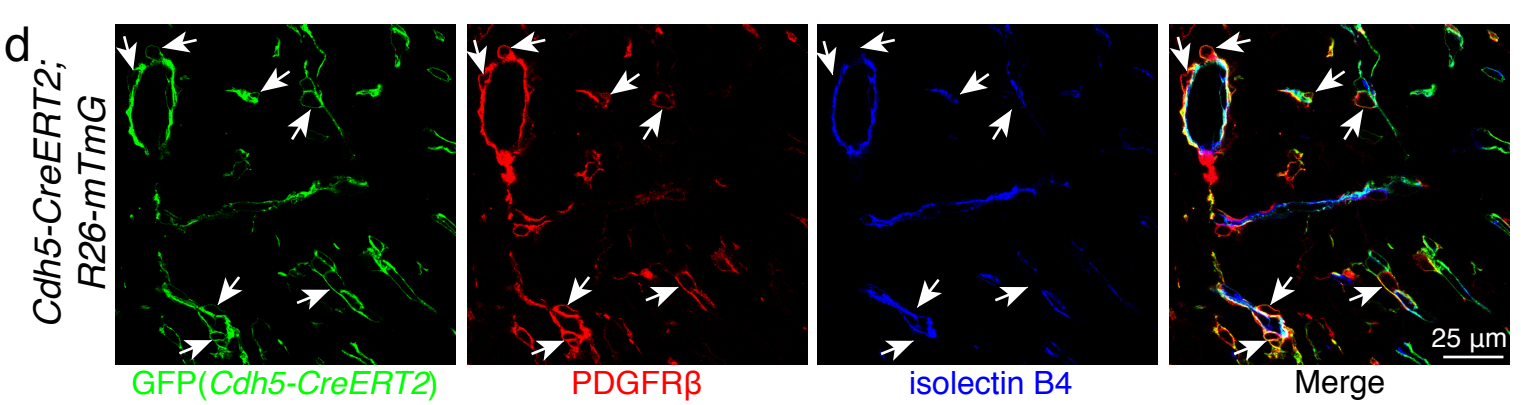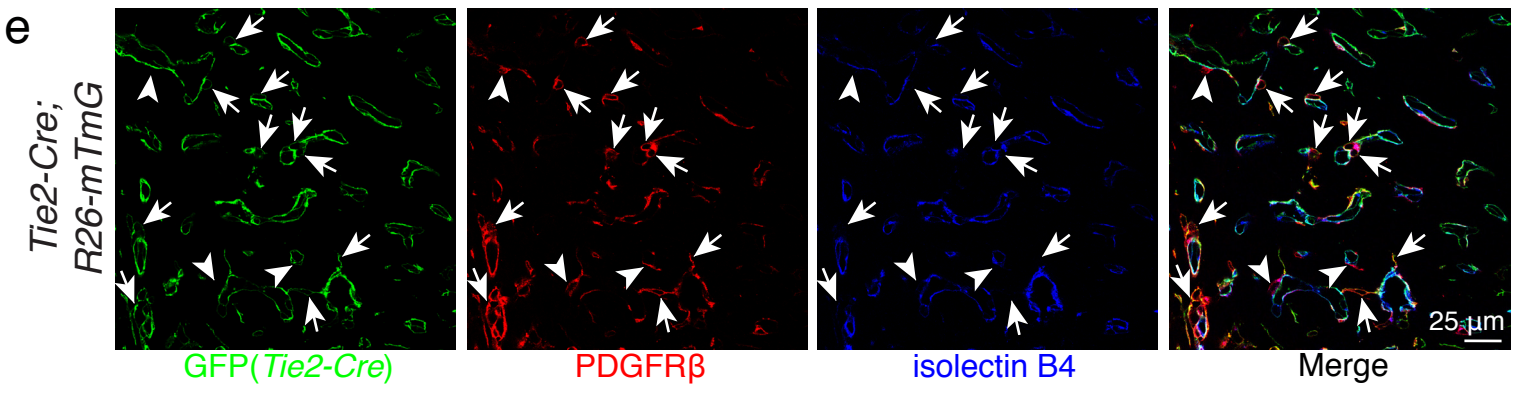



**Supplementary Figure 5 | Lineage tracing of neural crest and endothelial cells.**

- (a) Analysis of *Wnt1-Cre*-mediated recombination in the *Rosa26-mTmG* reporter background at E14.5. Note abundant GFP staining in the pulmonary valves (left panels) and other structures, but sparse signal in the heart ventricle (right panels).
- (b) Clonal analysis in *Cdh5-CreERT2 Rosa26-mTmG* double transgenic hearts at E16.5 following 4-OHT administration at E8.5. Higher magnification images show PDGFR $\alpha$  expression in epicardium but not in GFP+ cells in the myocardium.
- (c) Lineage tracing in *Tie2-Cre Rosa26-mTmG* double transgenic hearts at E16.5. Higher magnification images show PDGFR $\alpha$  signal in the epicardium but not in GFP+ cells in myocardium.
- (d) Clonal analysis in *Cdh5-CreERT2 Rosa26-mTmG* double transgenic hearts at E16.5 following 4-OHT administration at E8.5. Note abundance of EC-derived GFP+ PDGFR $\beta$ + mural cells (arrows). Images shown are separated channels of Fig. 3c.
- (e) Lineage tracing in *Tie2-Cre Rosa26-mTmG* double transgenic hearts at E16.5. EC-derived GFP+ PDGFR $\beta$ + mural cells (arrows) were highly abundant. Arrowheads indicate mural cells without GFP labeling and therefore of different developmental origin.

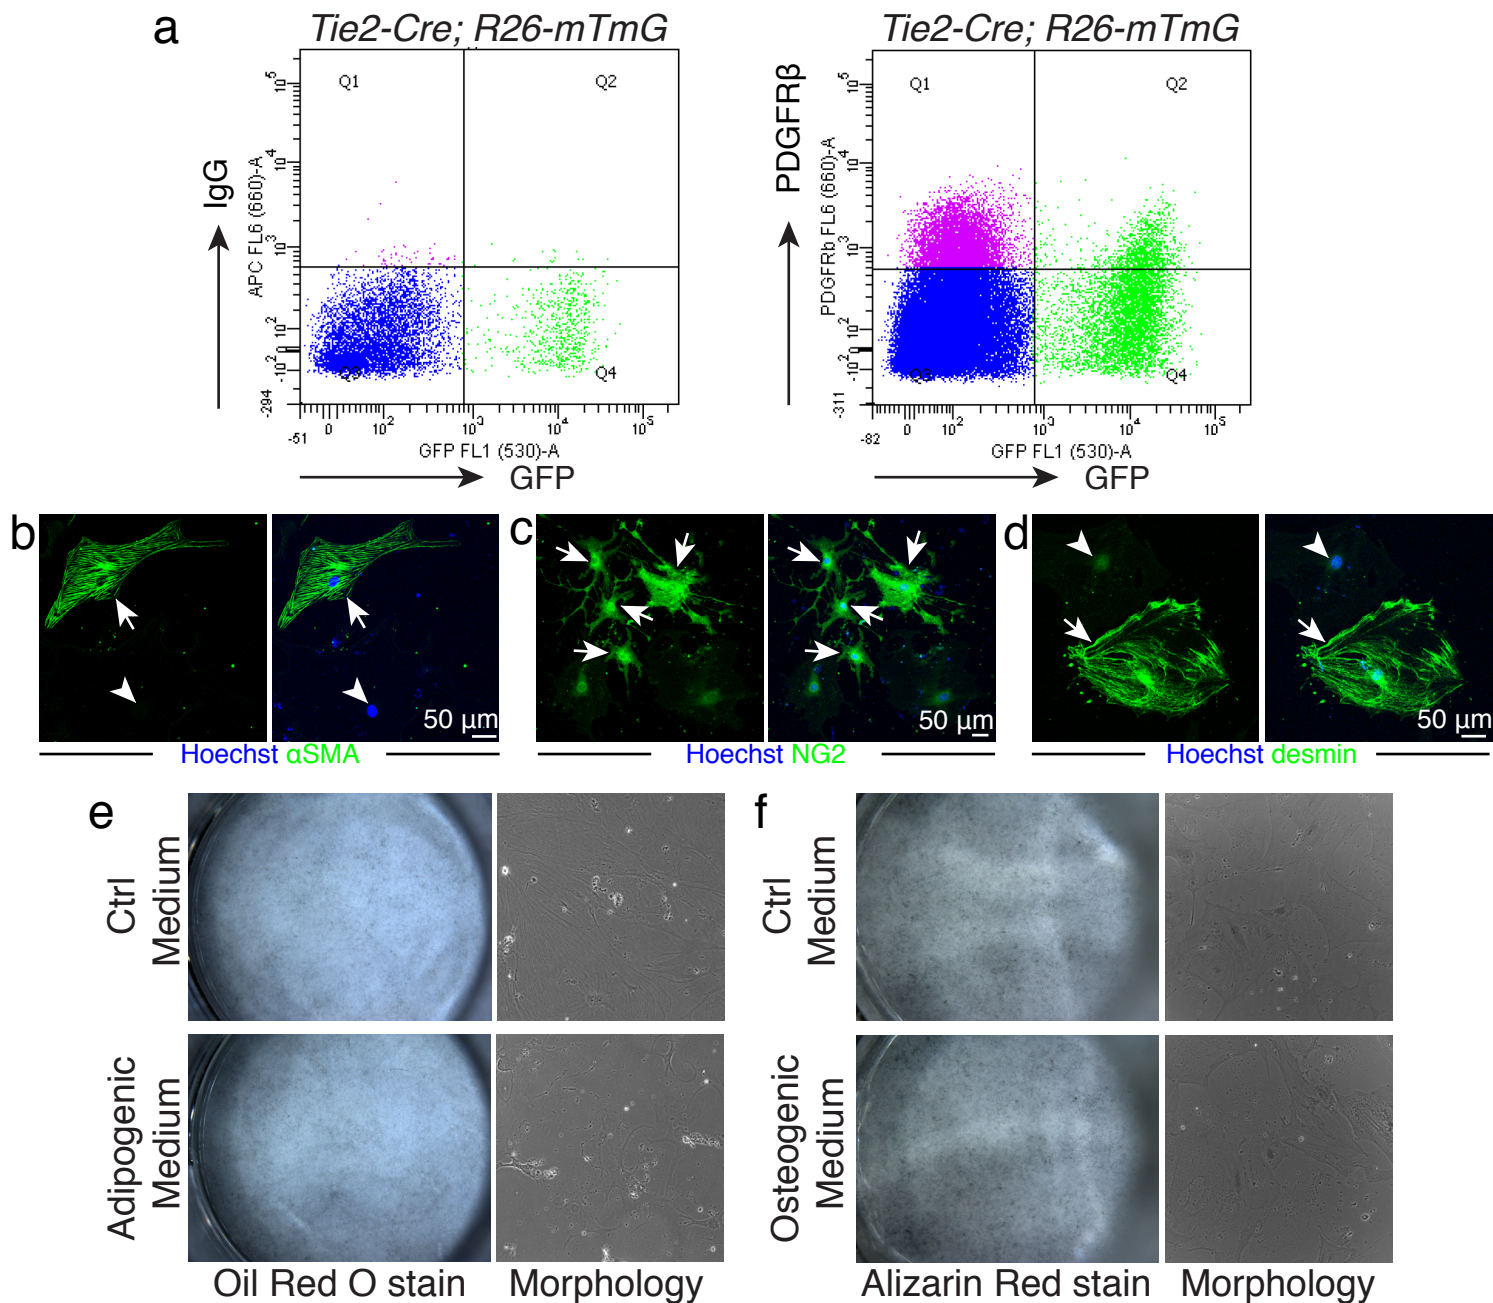

**Supplementary Figure 6 | Differentiation potential of EC-derived mesenchymal progenitors**

(a) Representative FACS plots from E12.5 *Tie2-Cre Rosa26-mTmG* heart. Cells in left panel were stained with isotype control antibody. EC-derived GFP<sup>+</sup> PDGFRβ<sup>+</sup> cells in Q2 of right panel were isolated for culture.

(b-d) Cell differentiation results in pericyte culture medium. Arrows indicate positive cells and arrowheads negative cells after staining for αSMA (b), NG2 (c) and desmin (d).

(e) Cell differentiation in adipogenic medium. Base medium was used as control, while base medium with adipogenic supplement was used to induce adipocyte formation. Left panels indicate absence of Oil Red O staining, right panels show morphology of cells after 21 days in culture.

(f) Cell differentiation in osteogenic medium. Base media was used as control, whereas osteogenic supplement was added to induce osteocyte formation. Left panels show absence of Alizarin Red staining in cell pellets. Right panels show typical cell morphology after 21 days in culture.

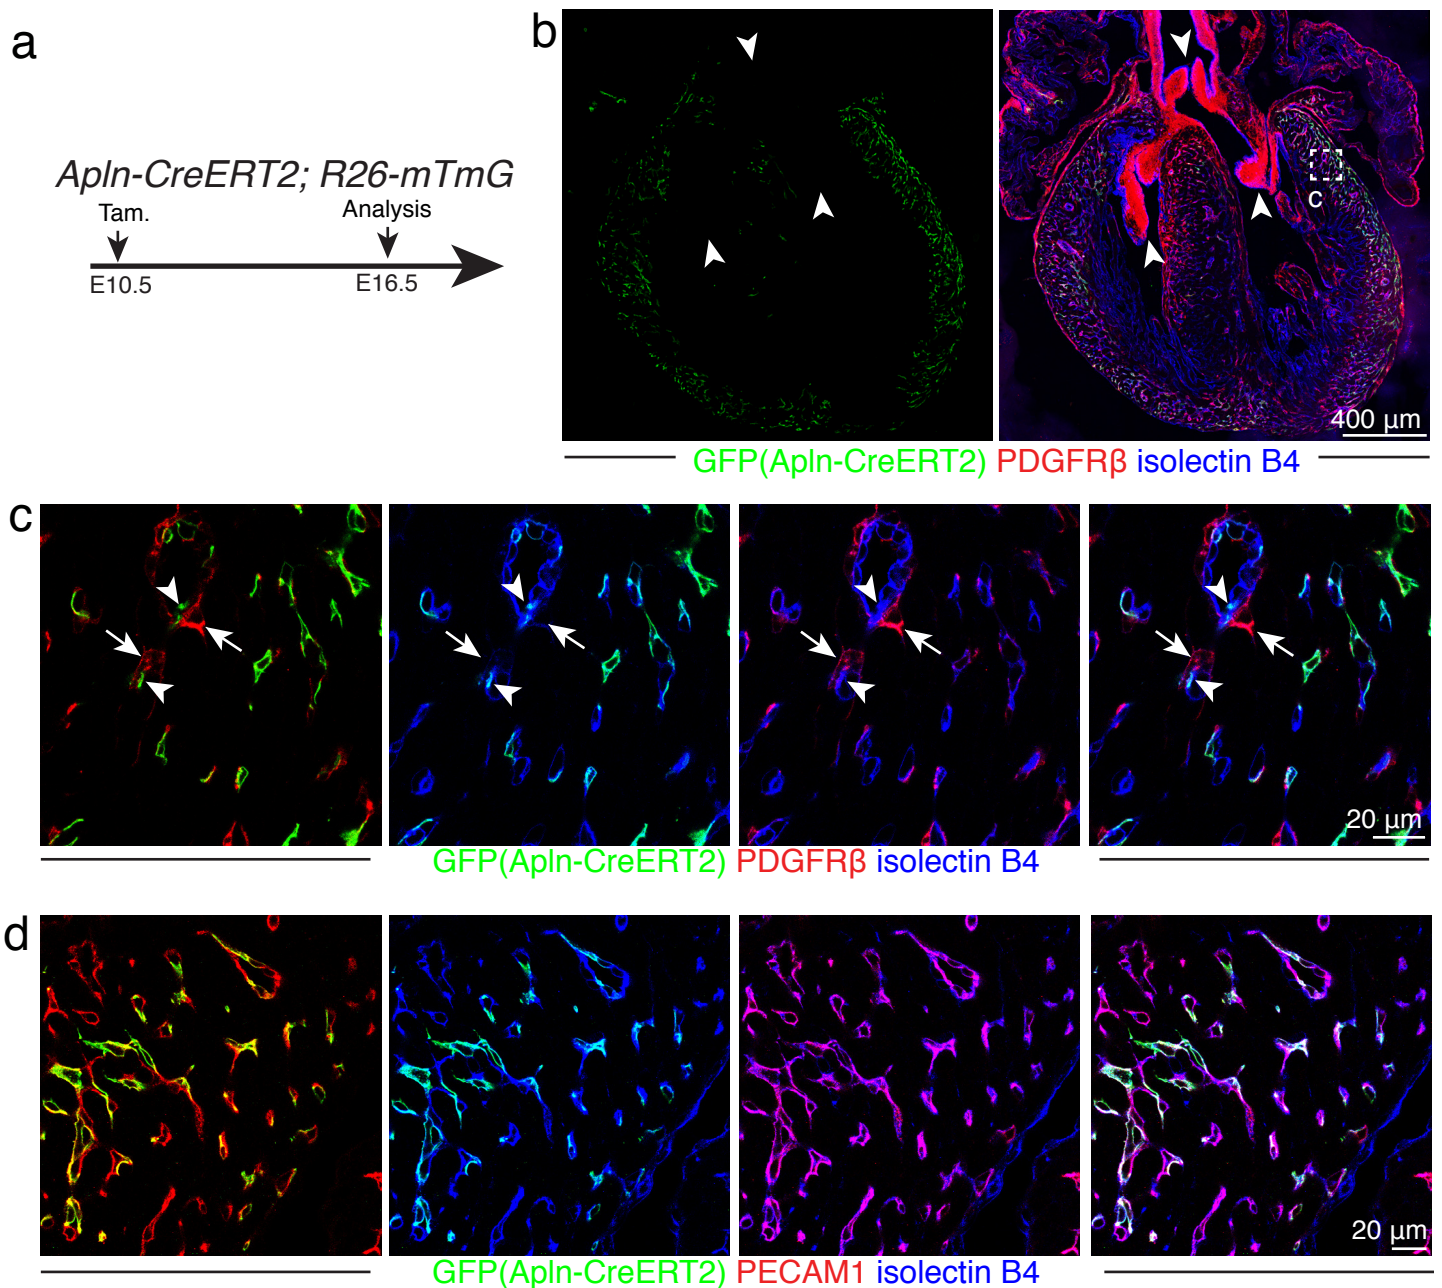

### Supplementary Figure 7 | Clonal analysis of subepicardial endothelial cells

(a) Clonal analysis strategy of *Apln-CreERT2 Rosa26-mTmG* mice indicating the stage of tamoxifen administration and analysis.

(b) At E16.5, GFP signal was found in myocardium and ventricular septum but was absent in PDGFR $\beta$ + mesenchymal cells in heart valves (white arrowheads).

(c) Higher magnification images show *Apln-CreERT2*-labeled coronary ECs (white arrowheads), which were distinct from PDGFR $\beta$ + cells (white arrows) in E16.5 myocardium.

(d) Higher magnification images showing that *Apln-CreERT2*-labeled cells were coronary ECs, which were stained by PECAM1 and isolectin B4.

a

*Nfatc1-CreERT2*; R26-RFP

4-OHT Analysis

E10.5  
E8.5

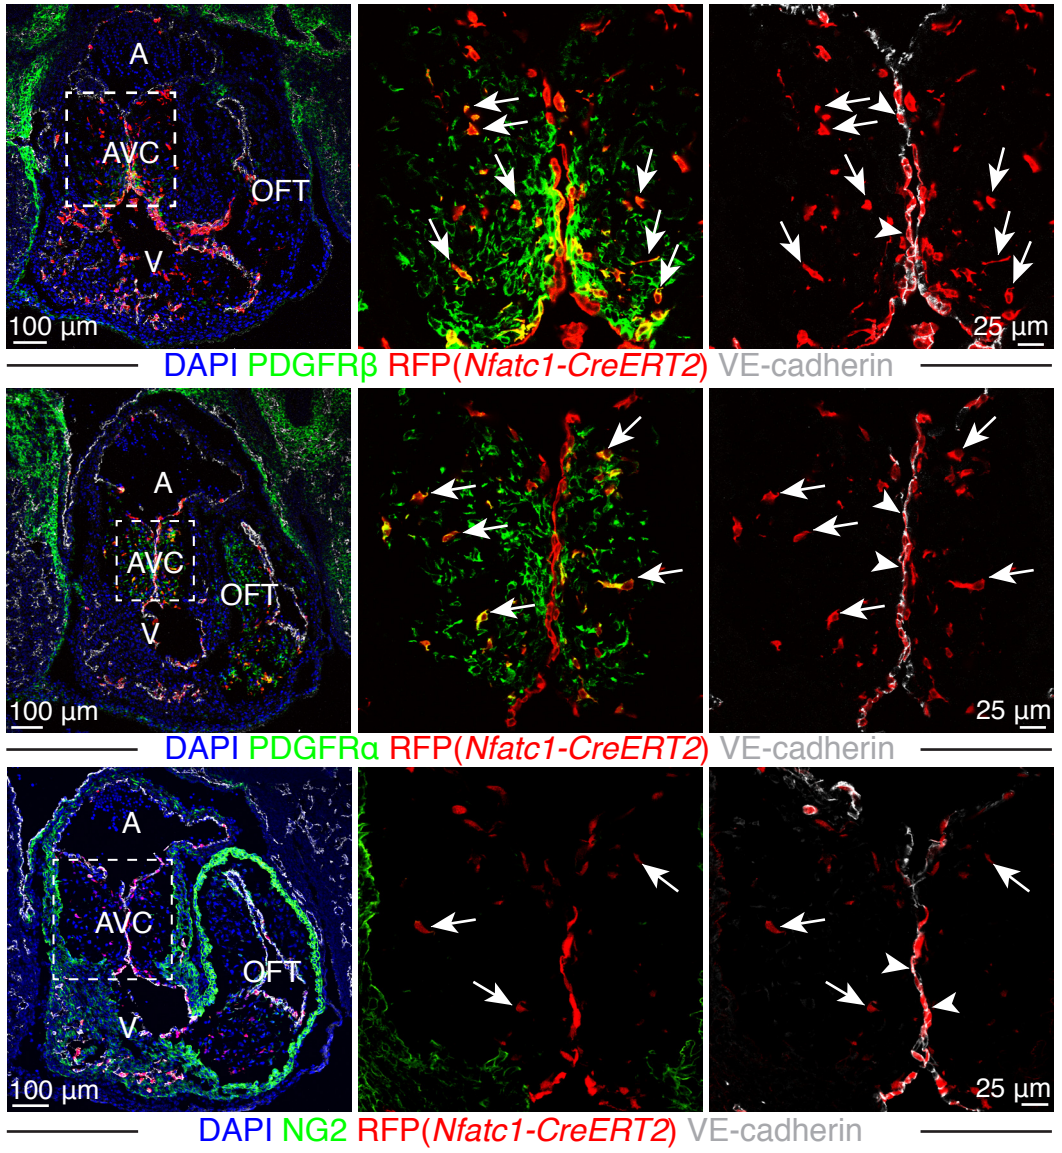

b

*Tie2-Cre*; R26-mTmG E10.5

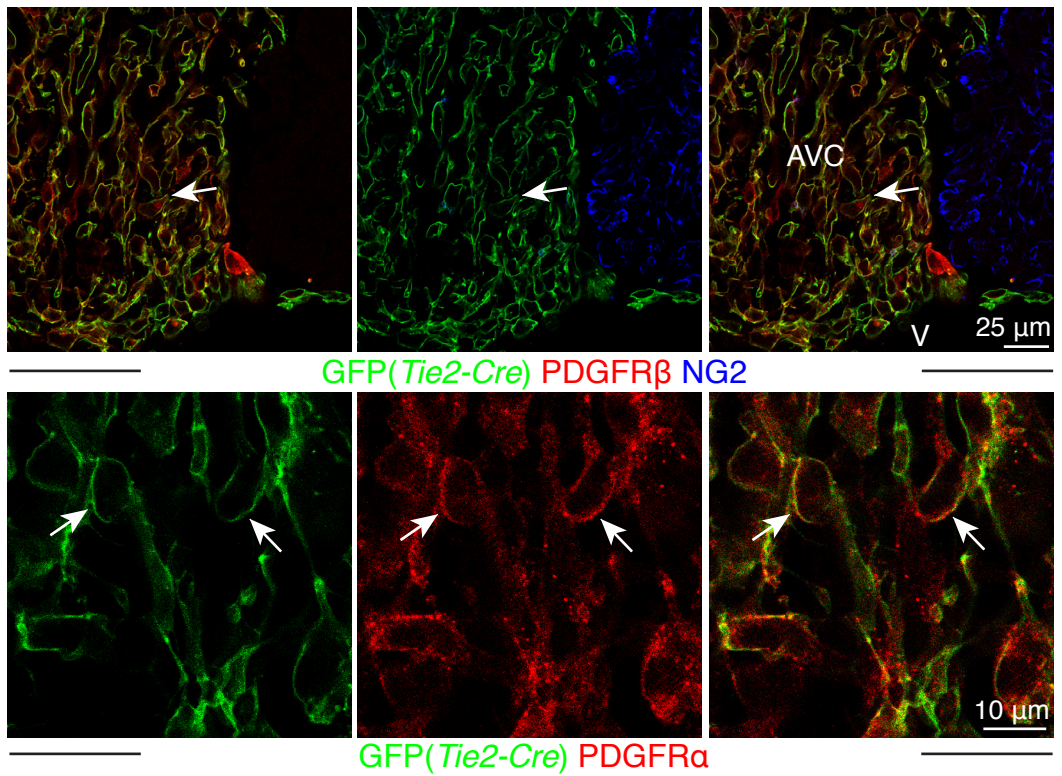

**Supplementary Figure 8 | Endocardial ECs differentiate into mesenchymal progenitors.**

(a) Clonal analysis in *Nfatc1-CreERT2 Rosa26-RFP* double transgenic hearts at E10.5 following 4-OHT administration at E8.5. Recombined, RFP<sup>+</sup> cells were located in the E10.5 VE-cadherin<sup>+</sup> (white) endocardium (arrowheads). RFP<sup>+</sup> PDGFR $\beta$ <sup>+</sup> PDGFR $\alpha$ <sup>+</sup> but NG2<sup>-</sup> cells were also detected in the adjacent endocardial cushions (arrows). A, atrium; V, ventricle; AVC, atrioventricular canal; OFT, outflow tract. Nuclei, DAPI (blue).

(b) Lineage tracing in *Tie2-Cre Rosa26-mTmG* double transgenic hearts at E10.5. Higher magnification images show GFP<sup>+</sup> PDGFR $\beta$ <sup>+</sup> PDGFR $\alpha$ <sup>+</sup> NG2<sup>-</sup> cells (arrows) in the atrioventricular canal. V, ventricle; AVC, atrioventricular canal

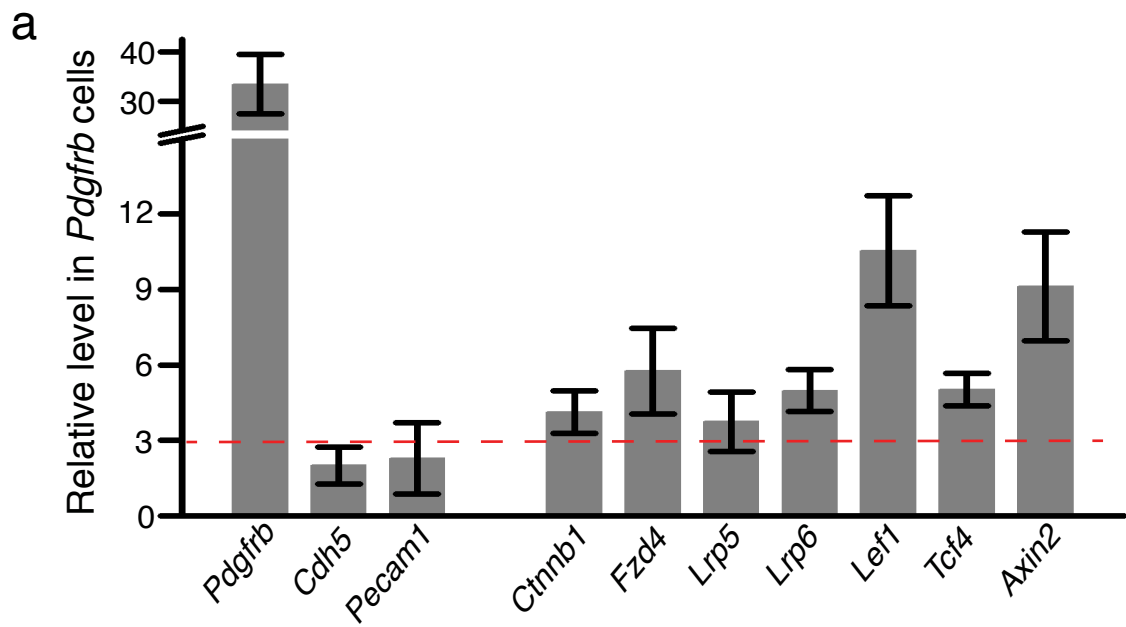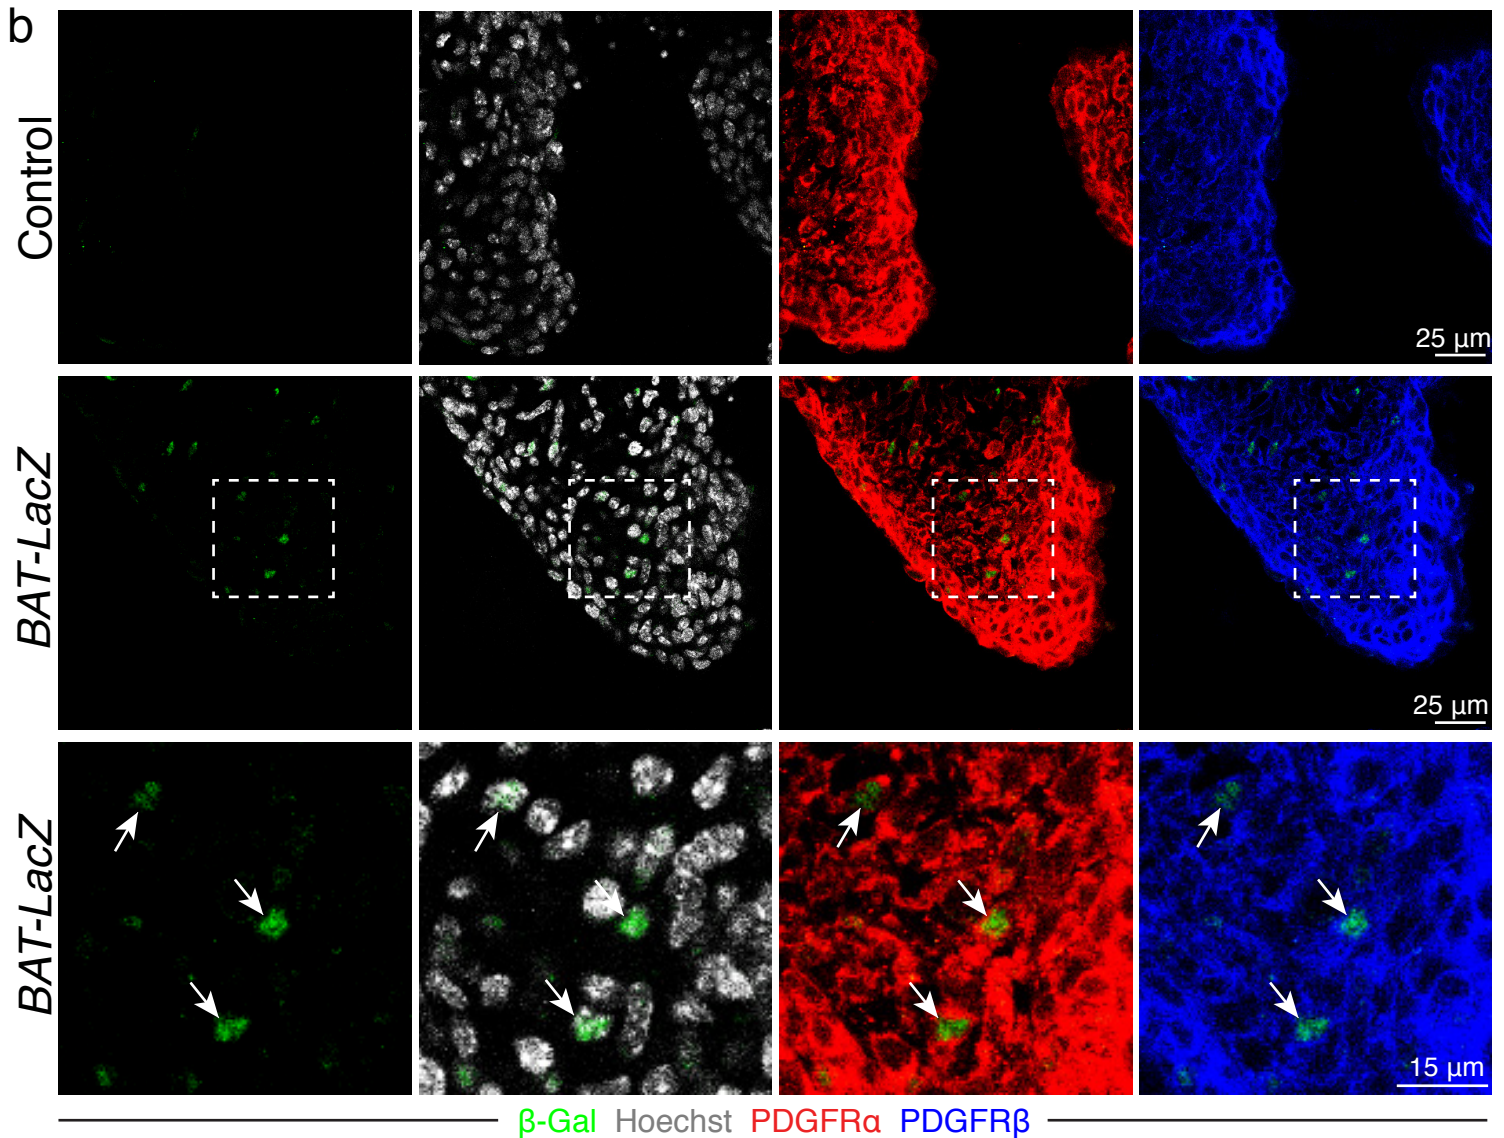

**Supplementary Figure 9 | Wnt signaling in embryonic PDGFR $\beta$ + cells in heart.**

(a) RiboTag RT-qPCR analysis of the indicated Wnt pathway genes in cardiac *Pdgfrb*(*BAC*)-*CreERT2*-expressing cells at E13.5. RNAs from RiboTag enrichment fraction were compared with input (See Methods). *Pdgfrb* was used as positive control, *Cdh5* and *Pecam1* as negative controls. n=3 (4 hearts/experiment). Error bars,  $\pm$  SEM.

(b) Detection of Wnt signaling activity with the *Tg*(*BAT-lacZ*)<sup>3*Picc*</sup> reporter (anti- $\beta$ -galactosidase immunostaining, green) in PDGFR $\alpha$ + PDGFR $\beta$ + double positive cells of E13.5 heart valves (arrows). No specific signal was detected in littermate control mice lacking the *Tg*(*BAT-lacZ*)<sup>3*Picc*</sup> transgene.

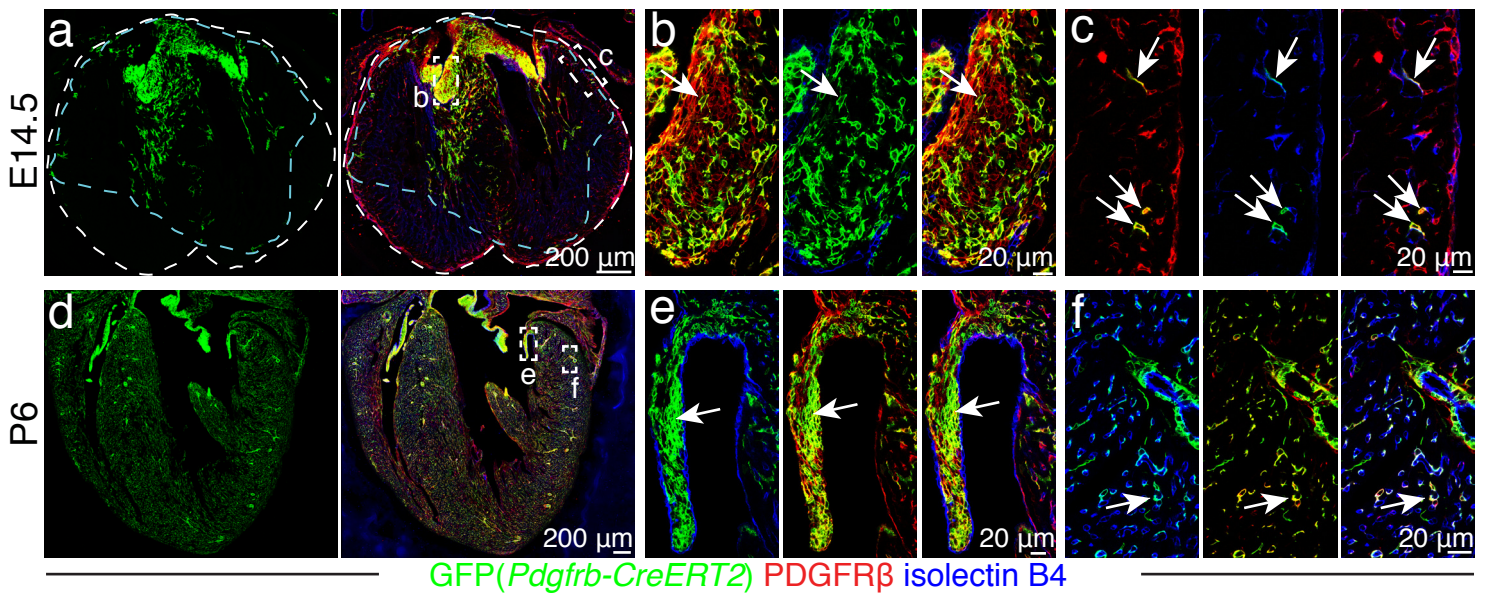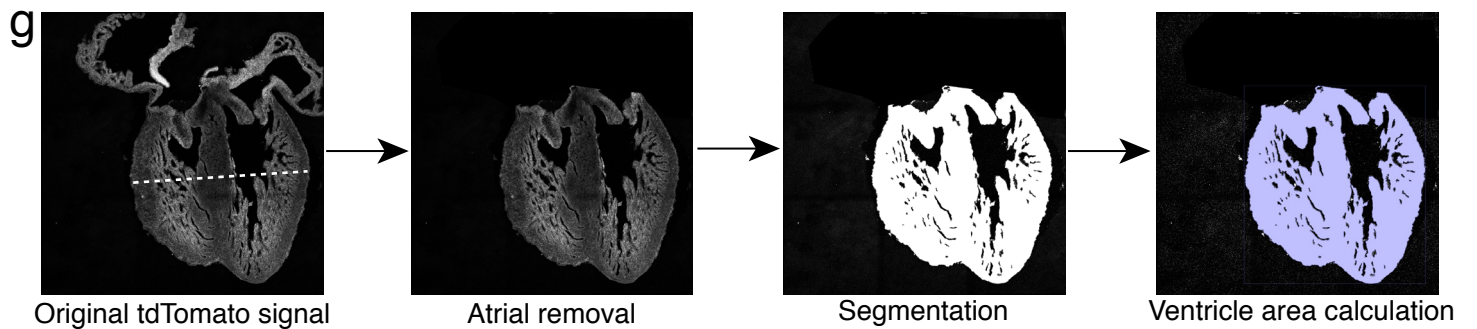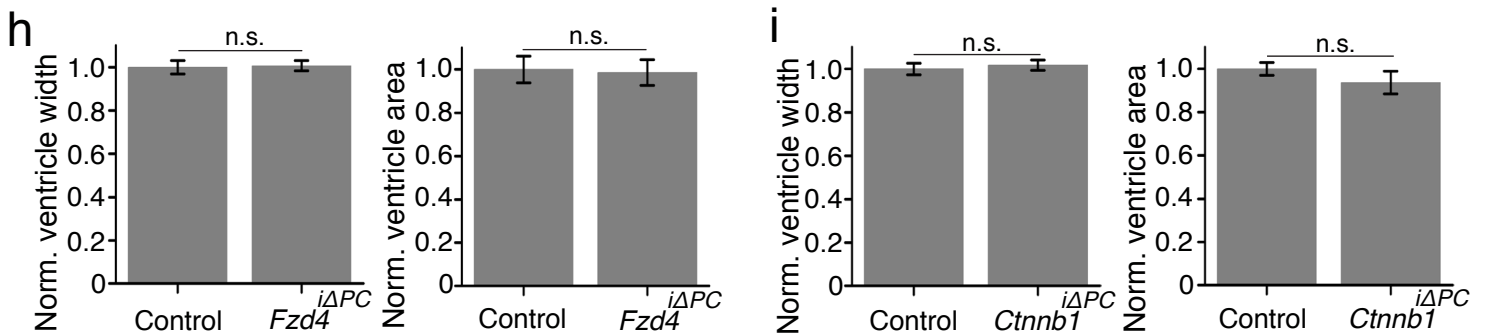

### Supplementary Figure 10 | Analysis of Wnt pathway mutant mice.

(a-f) Distribution of *Pdgfrb*(*BAC*)-*CreERT2*-labeled (GFP, green) PDGFR $\beta$ <sup>+</sup> (red) cells (arrows) at E14.5 (after tamoxifen administration from E9.5 to E12.5; a-c), and at P6 (tamoxifen from P1-P3; d-f). Panels on the right show higher magnifications of the corresponding insets with details of heart valves (b, e) and myocardium (c, f). ECs, isolectin B4 (blue). White dashed lines in (a) mark ventricle size and cyan dashed lines indicate the area containing GFP<sup>+</sup> cells, as analyzed in Fig. 6b and 6d.

(g) Representative images showing the calculation of 'ventricle area' and 'ventricle width' (dashed line in left image), as shown in (h) and (i). The tdTomato signal of *Rosa26-mTmG* Cre reporter animals was processed and used for calculations, as indicated.

(h and i) Quantification of ventricle width and area for 8 E14.5 *Fzd4*<sup>*iΔPC*</sup> hearts relative to 8 heterozygous littermate controls (h), and for 7 E14.5 *Ctnnb1*<sup>*iΔPC*</sup> embryos relative to 8 heterozygous control littermates (i). Error bars,  $\pm$  SEM. P values, two-tailed unpaired t-test; n.s., no significance.

**Supplementary Table 1 | Summary of genetic mouse models used in this study**

| Full Name                                                               | Short name                     | Inducible | Reporter                                      | Purpose                                                 |
|-------------------------------------------------------------------------|--------------------------------|-----------|-----------------------------------------------|---------------------------------------------------------|
| <i>Pdgfra</i> <sup>tm11(EGFP)Sor</sup>                                  | -                              |           | H2B-GFP (nuclear)                             | Detection of PDGFR $\alpha$ -expressing cells           |
| <i>Tg(Cspg4-dsRed.T1)</i> <sup>1Akik</sup>                              | -                              |           | DsRed                                         | Detection of NG2/Cspg4-expressing cells                 |
| <i>Tg(BAT-lacZ)</i> <sup>3Picc</sup>                                    | -                              |           | $\beta$ -Gal                                  | Detection of Wnt signaling <i>in vivo</i>               |
| <i>Rpl22</i> <sup>tm1.1Psam</sup>                                       | <i>Rpl22</i>                   |           | HA                                            | Pull-down of actively translating mRNAs                 |
| <i>Pdgfrb(BAC)-CreERT2</i>                                              | <i>Pdgfrb-CreERT2</i>          | Yes       | -                                             | Labeling of PDGFR $\beta$ + cells and their descendants |
| <i>Cdh5(PAC)-CreERT2</i>                                                | <i>Cdh5-CreERT2</i>            | Yes       | -                                             | Labeling of ECs and their descendants                   |
| <i>Apln-CreERT2</i>                                                     | -                              | Yes       | -                                             | Labeling of subepicardial ECs and their descendants     |
| <i>Nfatc1-CreERT2</i>                                                   | -                              | Yes       | -                                             | Labeling of endocardial ECs and their descendants       |
| <i>Tie2-Cre</i>                                                         | -                              |           | -                                             | Labeling of ECs and their descendants                   |
| <i>Wnt1-Cre</i>                                                         | -                              |           | -                                             | Labeling of neural crest cells and their descendants    |
| <i>Rosa26-mT/mG</i>                                                     | <i>R26-mTmG</i>                |           | Cre-induced switch from mem-Tomato to mem-GFP | Labeling of Cre-positive cells and their descendants    |
| <i>Rosa26-RFP</i>                                                       | <i>R26-RFP</i>                 |           | RFP                                           | Labeling of Cre-positive cells and their descendants    |
| <i>Fzd4</i> <sup>tm2.1Nat</sup>                                         | -                              |           | -                                             | Conditional knockout of <i>Fzd4</i>                     |
| <i>Ctnnb1</i> <sup>tm2Kem</sup>                                         | -                              |           | -                                             | Conditional knockout of <i>Ctnnb1</i>                   |
| <i>Wls</i> <sup>tm1.1Lan</sup>                                          | -                              |           | -                                             | Conditional knockout of <i>Wls</i>                      |
| <i>Pdgfrb(BAC)-CreERT2 Rosa26-mT/mG</i>                                 | <i>Pdgfrb-CreERT2 R26-mTmG</i> | Yes       | mem-GFP after Cre recombination               | Labeling of PDGFR $\beta$ + cells and their descendants |
| <i>Cdh5(PAC)-CreERT2 Rosa26-mT/mG</i>                                   | <i>Cdh5-CreERT2 R26-mTmG</i>   | Yes       | mem-GFP after Cre recombination               | Labeling of ECs and their descendants                   |
| <i>Tie2-Cre Rosa26-mT/mG</i>                                            | <i>Tie2-Cre R26-mTmG</i>       |           | mem-GFP after Cre recombination               | Labeling of ECs and their descendants                   |
| <i>Wnt1-Cre Rosa26-mT/mG</i>                                            | <i>Wnt1-Cre R26-mTmG</i>       |           | mem-GFP after Cre recombination               | Labeling of neural crest cells and their descendants    |
| <i>Apln-CreERT2 Rosa26-mT/mG</i>                                        | <i>Apln-CreERT2 R26-mTmG</i>   | Yes       | mem-GFP after Cre recombination               | Labeling of subepicardial ECs and their descendants     |
| <i>Nfatc1-CreERT2 Rosa26-RFP</i>                                        | <i>Nfatc1-CreERT2 R26-RFP</i>  | Yes       | RFP                                           | Labeling of endocardial ECs and their descendants       |
| <i>Pdgfrb(BAC)-CreERT2 Fzd4</i> <sup>tm2.1Nat</sup> <i>Rosa26-mT/mG</i> | <i>Fzd4</i> <sup>iAPC</sup>    | Yes       | mem-GFP after Cre recombination               | Knockout of <i>Fzd4</i> in PDGFR $\beta$ + cells        |



|                                                                                                  |                                                   |     |                                 |                                                                        |
|--------------------------------------------------------------------------------------------------|---------------------------------------------------|-----|---------------------------------|------------------------------------------------------------------------|
| <i>Pdgfrb</i> (BAC)-<br><i>CreERT2</i><br><i>Ctnnb1</i> <sup>tm2Kem</sup><br><i>Rosa26-mT/mG</i> | <i>Ctnnb1</i> <sup>iAPC</sup>                     | Yes | mem-GFP after Cre recombination | Knockout of <i>Ctnnb1</i> in PDGFRβ <sup>+</sup> cells                 |
| <i>Cdh5</i> (PAC)-<br><i>CreERT2</i> <i>Wls</i> <sup>tm1.1Lan</sup>                              | <i>Wls</i> <sup>iAEC</sup>                        | Yes | -                               | Knockout of <i>Wls</i> in ECs                                          |
| <i>Pdgfrb</i> (BAC)-<br><i>CreERT2</i><br><i>Rpl22</i> <sup>tm1.1Psam</sup>                      | <i>Pdgfrb</i> -<br><i>CreERT2</i><br><i>Rpl22</i> | Yes | HA                              | Pull-down of actively translating mRNAs from PDGFRβ <sup>+</sup> cells |
